# Supplementary material
Source: publisher figshare collection journal article supplement (https://acs.figshare.com/ndownloader/files/4267189)

**Figure S1.** Primer extension assays opposite the *N*3-CMdT and *O*<sup>4</sup>-CMdT lesions with yeast polymerase  $\eta$  in the presence of all four dNTPs [250  $\mu$ M each]. The products were resolved with 20% denaturing polyacrylamide gels.

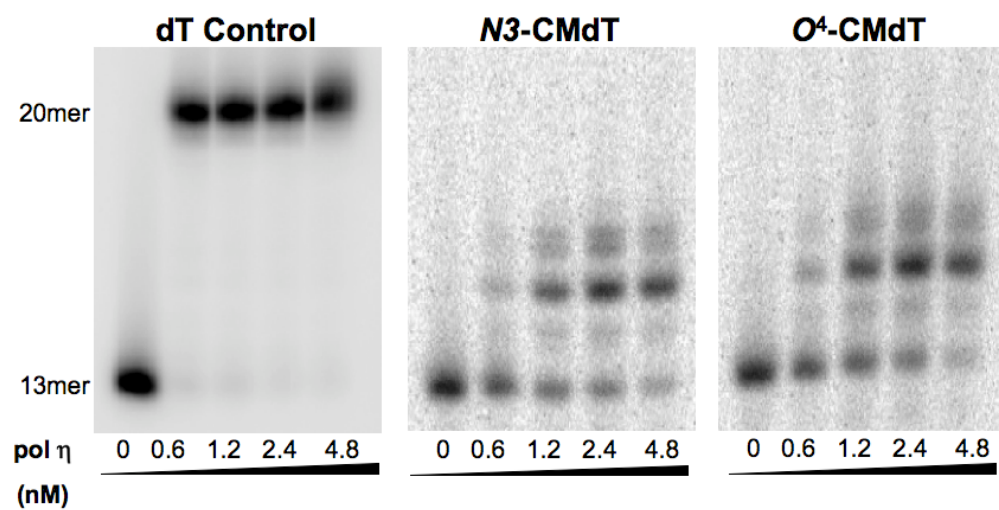

**Figure S2.** Representative gel images for steady-state kinetic assays monitoring nucleotide incorporation opposite the  $N^6$ -CMdA and  $N^4$ -CMdC and the corresponding unmodified dA and dC using 1.2 nM yeast polymerase  $\eta$ . Reactions were carried out in the presence of individual dNTPs with the highest concentrations indicated in the figures. The dNTP concentration ratios between adjacent lanes were 0.50.

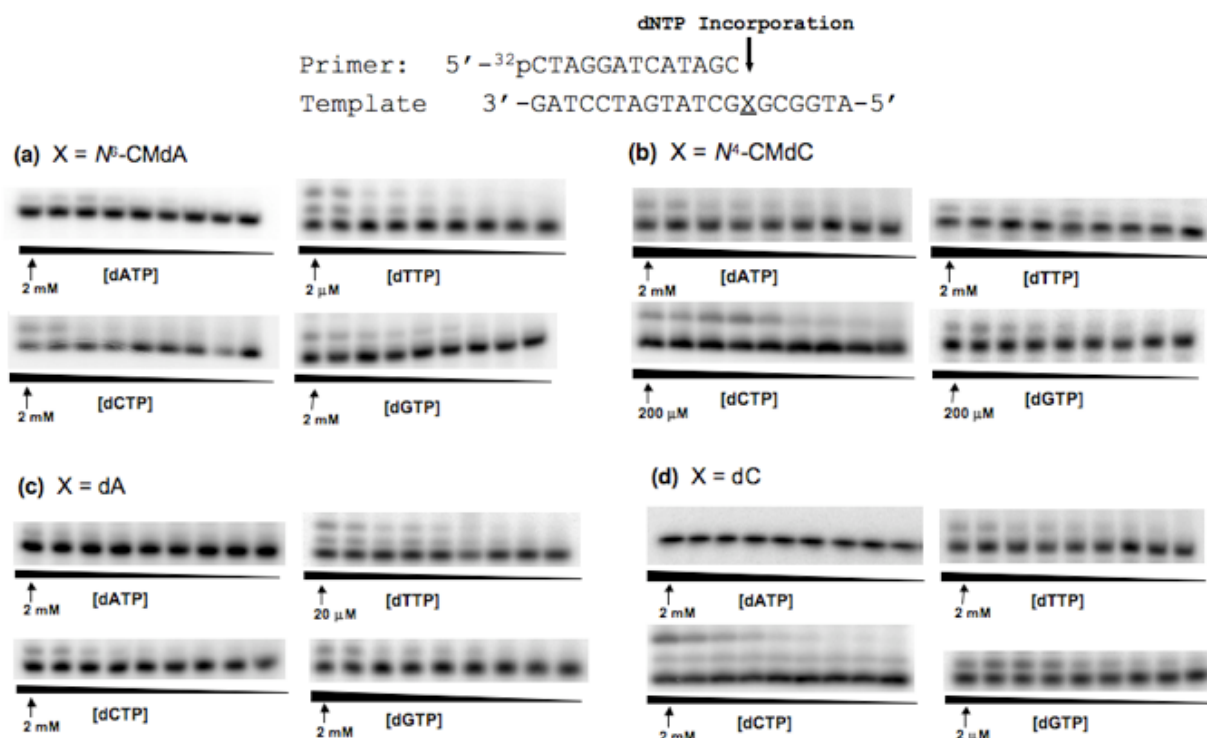

**Figure S3.** Representative gel images for steady-state kinetic assays measuring extension past  $N^6$ -CMdA and  $N^4$ -CMdC lesions with nucleoside opposite the lesions indicated in the figure as ‘N’. Reactions were carried out using 1.2 nM yeast polymerase  $\eta$  and in the presence of individual dNTPs with the highest concentrations indicated in the figures. The concentration ratios between neighboring lanes were 0.50.

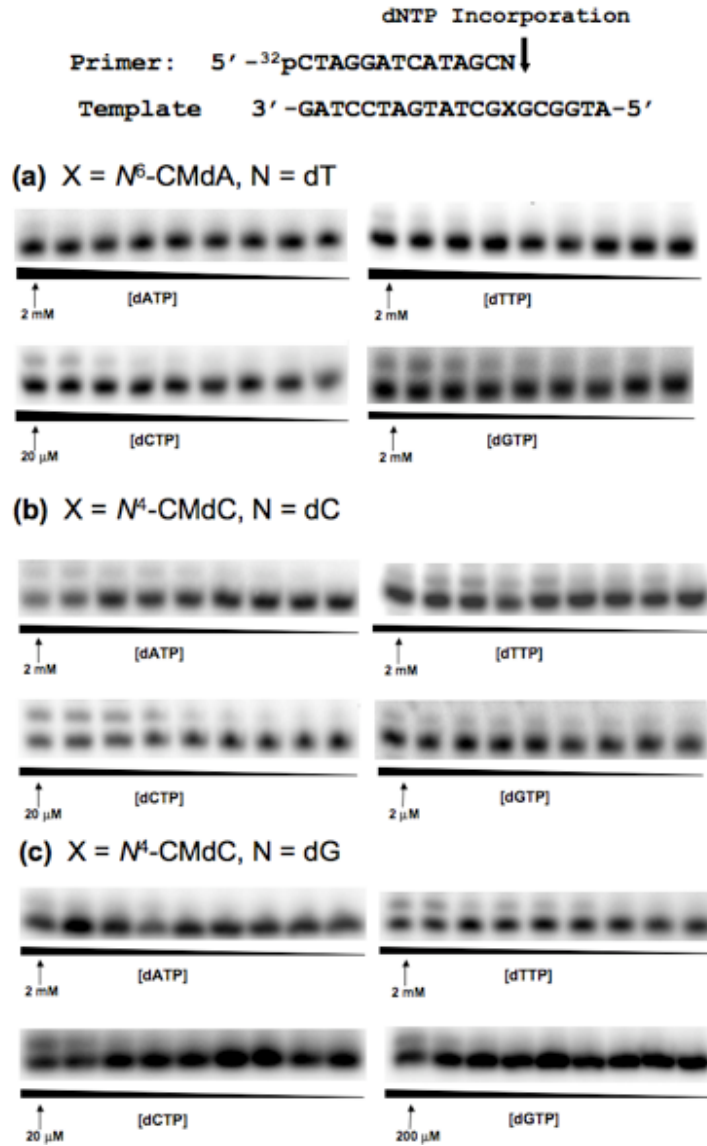

**Figure S4.** Representative gel images for steady-state kinetic assays measuring extension past the unmodified controls dA, dC, and dT, with nucleoside opposite the control indicated in the figure as ‘N’. Reactions were carried out using 1.2 nM yeast polymerase  $\eta$  and in the presence of individual dNTPs with the highest concentrations indicated in the figures. The concentration ratios between neighboring lanes were 0.50.

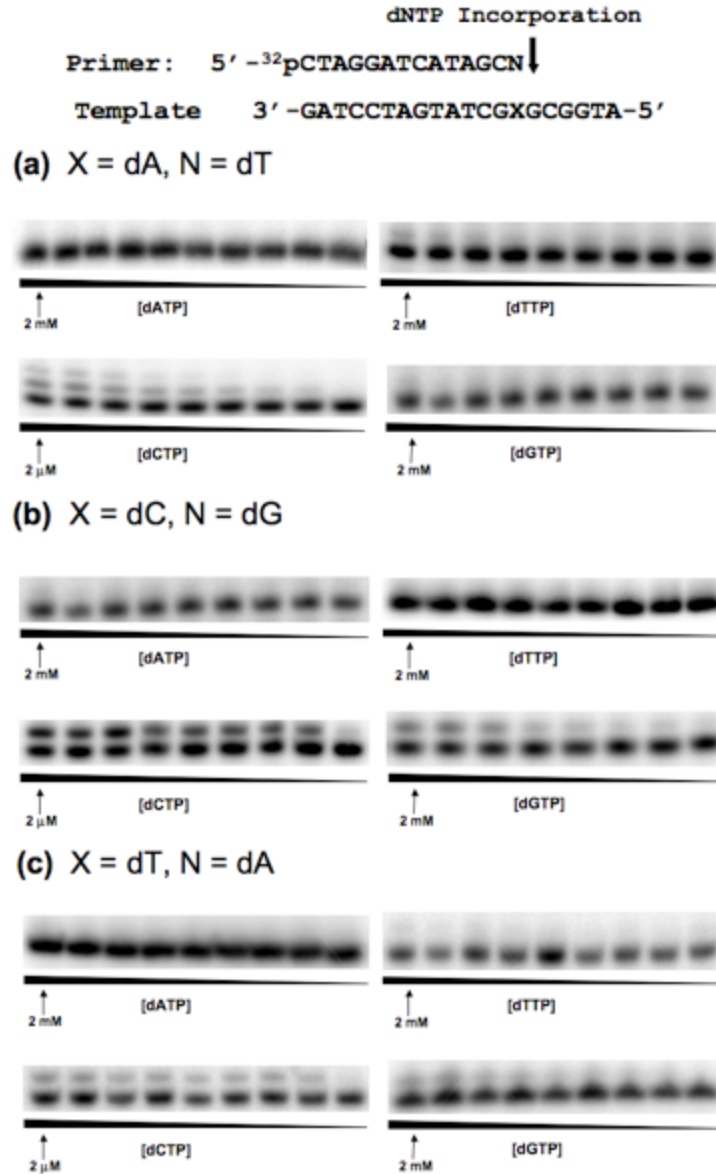

Supplement: Supplementary file 1 [file 4267189]
